# Supplementary material for: Bronchodilator reversibility as a diagnostic test for adult asthma: findings from the population-based Tasmanian Longitudinal Health Study
Source: PubMed Central journal article supplement — ERJ Open Res. 2021 Feb 8;7(1):00042-2020. doi: 10.1183/23120541.00042-2020 (PMC7869605; doi:10.1183/23120541.00042-2020), 2021-02-08
Supplement: 00042-2020.SUPPLEMENT.pdf [file 00042-2020.SUPPLEMENT.pdf]

#### Methods E1: Statistical selection of cut-off points (Youden and Liu Indexes)

Two statistically-selected cut-off points, the Youden and Liu Indexes, were calculated using the TAHS dataset. The Youden Index, also known as the Youden J statistic, defines the optimal cut-off as the point which maximises the sum of the sensitivity and specificity (1, 2). In contrast, the Liu Index defines the optimal cut-off as the point which maximises the product of the sensitivity and specificity (3). Both statistical approaches place equal weighting to sensitivity and specificity.

#### Methods E2: Selection of the symptomatic sample

The symptomatic sample was a subset of the original whole TAHS sample. Symptomatic individuals were identified by positive responses to one or more survey-based questions related to respiratory symptoms in the last 12 months (wheeze, shortness of breath or chest tightness). These questions have been validated and used in other population-based observational studies including the European Community Respiratory Health Survey (ECRHS).

Symptomatic sample defined as a positive response to one or more of the following:

- Have you had wheezing or whistling in your chest in the last 12 months?, or
- Have you had an attack of shortness of breath at rest in the last 12 months?, or
- Have you had an attack of shortness of breath after exercise in the last 12 months?, or
- Have you woken due to a feeling of tightness in your chest in the last 12 months?, or
- Have you been woken at night by an attack of shortness of breath in the last 12 months?

Table E1. Comparison of bronchodilator reversibility between the reference population and disease subgroups

|                  | $\Delta FEV_1$ (ml)   |         | $\Delta FEV_{1initial}$ |         | $\Delta FEV_{1predicted}$ |         |
|------------------|-----------------------|---------|-------------------------|---------|---------------------------|---------|
|                  | Mean Diff. (95%CI)    | p-value | Mean Diff. (95%CI)      | p-value | Mean Diff. (95%CI)        | p-value |
| Reference Sample | Baseline              | -       | Baseline                | -       | Baseline                  | -       |
| Current Asthma   | +55.5 (33.2, 79.7)    | <0.001  | +2.6 (1.7, 3.4)         | <0.001  | +1.6 (0.9, 2.4)           | <0.001  |
| COPD             | +48.8 (18.1, 79.4)    | 0.002   | +3.6 (2.5, 4.7)         | <0.001  | +1.5 (0.6, 2.4)           | 0.002   |
| ACO              | +155.7 (118.5, 193.0) | <0.001  | +9.7 (8.3, 11.1)        | <0.001  | +4.7 (3.6, 5.8)           | <0.001  |
| Current Asthma   | Baseline              | -       | Baseline                | -       | Baseline                  | -       |
| COPD             | -18.2 (-64.7, 28.2)   | 0.44    | +0.6 (-1.4, 2.6)        | 0.55    | -0.4 (-0.8, 1.0)          | 0.56    |
| ACO              | +111.7 (54.9, 168.5)  | <0.001  | +8.1 (5.3, 10.8)        | <0.001  | +3.3 (1.6, 5.0)           | <0.001  |
| COPD             | Baseline              | -       | Baseline                | -       | Baseline                  | -       |
| ACO              | +129.9 (57.9, 202.0)  | 0.001   | +7.5 (3.8, 11.1)        | <0.001  | 3.7 (1.6, 5.8)            | 0.001   |

COPD: chronic obstructive pulmonary disease. ACO: asthma-COPD overlap

Table E2. Comparison of bronchodilator reversibility in participants with adult asthma (current asthma OR ACO) by inhaled corticosteroids (ICS) use

|             | $\Delta FEV_1$ (ml) |         | $\Delta FEV_{1initial}$ |         | $\Delta FEV_{1predicted}$ |         |
|-------------|---------------------|---------|-------------------------|---------|---------------------------|---------|
|             | Mean Diff. (95%CI)  | p-value | Mean Diff. (95%CI)      | p-value | Mean Diff. (95%CI)        | p-value |
| No ICS use  | Baseline            | -       | Baseline                | -       | Baseline                  | -       |
| Current use | +60.5 (29.2, 91.8)  | <0.001  | +3.3 (2.0, 4.6)         | <0.001  | +1.8 (0.8, 2.7)           | <0.001  |

MD: Mean Difference

Table E3: Youden Cut-off Points and corresponding diagnostic parameters

| Diagnostic utility of GINA BDR cut-off point:               | Youden Cut-off | Sensitivity (95% CI) | Specificity (95% CI) |
|-------------------------------------------------------------|----------------|----------------------|----------------------|
| Asthma:                                                     |                |                      |                      |
| $\Delta$ FEV <sub>1</sub> (ml) ULN                          | 205.0 ml       | 82%                  | 56%                  |
| $\Delta$ FEV <sub>1</sub> % of initial FEV <sub>1</sub> ULN | 4.3%           | 51%                  | 64%                  |
| $\Delta$ FEV <sub>1</sub> % of pred. FEV <sub>1</sub> ULN   | 4.1%           | 51%                  | 62%                  |
| Asthma-COPD overlap                                         |                |                      |                      |
| $\Delta$ FEV <sub>1</sub> (ml) ULN                          | 110.0 ml       | 93%                  | 54%                  |
| $\Delta$ FEV <sub>1</sub> % of initial FEV <sub>1</sub> ULN | 6.2%           | 79%                  | 79%                  |
| $\Delta$ FEV <sub>1</sub> % of pred. FEV <sub>1</sub> ULN   | 4.3%           | 81%                  | 65%                  |

ULN: Upper limit of normal

$\Delta$ FEV<sub>1</sub> ULN: 280 ml,  $\Delta$ FEV<sub>1</sub> % of initial FEV<sub>1</sub> ULN: 9.2%,  $\Delta$ FEV<sub>1</sub> % of pred. FEV<sub>1</sub> ULN: 8.8%

Table E4: Liu Cut-off Points and corresponding diagnostic parameters

| Diagnostic utility of GINA BDR cut-off point:               | Liu Cut-off | Sensitivity (95% CI) | Specificity (95% CI) |
|-------------------------------------------------------------|-------------|----------------------|----------------------|
| Asthma:                                                     |             |                      |                      |
| $\Delta$ FEV <sub>1</sub> (ml) ULN                          | 100.0 ml    | 54%                  | 56%                  |
| $\Delta$ FEV <sub>1</sub> % of initial FEV <sub>1</sub> ULN | 4.4%        | 51%                  | 64%                  |
| $\Delta$ FEV <sub>1</sub> % of pred. FEV <sub>1</sub> ULN   | 4.0%        | 51%                  | 61%                  |
| Asthma-COPD overlap                                         |             |                      |                      |
| $\Delta$ FEV <sub>1</sub> (ml) ULN                          | 115.0 ml    | 88%                  | 57%                  |
| $\Delta$ FEV <sub>1</sub> % of initial FEV <sub>1</sub> ULN | 6.2%        | 79%                  | 79%                  |
| $\Delta$ FEV <sub>1</sub> % of pred. FEV <sub>1</sub> ULN   | 4.3%        | 65%                  | 73%                  |

ULN: Upper limit of normal

$\Delta$ FEV<sub>1</sub> ULN: 280 ml,  $\Delta$ FEV<sub>1</sub> % of initial FEV<sub>1</sub> ULN: 9.2%,  $\Delta$ FEV<sub>1</sub> % of pred. FEV<sub>1</sub> ULN: 8.8%

Table E5. Basic characteristics of the disease subgroups in the 2012 TAHS study (Symptomatic Sample)

|                                                 | No Airways Disease (n=661) | Asthma (n=134) | COPD (n=50)   | Asthma-COPD overlap (n=41) |
|-------------------------------------------------|----------------------------|----------------|---------------|----------------------------|
| Age, years                                      | 52.8 (0.8)                 | 53.0 (0.8)     | 52.8 (0.7)    | 52.8 (0.7)                 |
| BMI, kgm <sup>-2</sup>                          | 29.9 (5.9)                 | 30.4 (6.8)     | 27.6 (6.9)    | 29.0 (7.3)                 |
| Female, n (%)                                   | 344 (52%)                  | 71 (53%)       | 29 (58%)      | 19 (46%)                   |
| Smoking History, n (%)                          |                            |                |               |                            |
| Never                                           | 261 (40%)                  | 67 (51%)       | 6 (12%)       | 8 (20%)                    |
| Former                                          | 241 (37%)                  | 52 (39%)       | 14 (29%)      | 15 (37%)                   |
| Current                                         | 151 (23%)                  | 13 (10%)       | 29 (59%)      | 18 (44%)                   |
| Asthma History                                  |                            |                |               |                            |
| Early-onset, n (%)                              | -                          | 66% (50%)      | -             | 22 (54%)                   |
| Current ICS use, n (%)                          | -                          | 68 (51%)       | 1 (2%)        | 17 (41%)                   |
| Asthma Severity                                 |                            |                |               |                            |
| Intermittent                                    | -                          | 10 (8%)        | -             | 0 (0%)                     |
| Mild persistent                                 | -                          | 31 (26%)       | -             | 8 (30%)                    |
| Moderate-severe persistent                      | -                          | 79 (66%)       | -             | 19 (70%)                   |
| Pre-BD Spirometry                               |                            |                |               |                            |
| FEV <sub>1</sub> (% predicted)                  | 95.0 (14.0)                | 91.0 (15.3)    | 76.0 (17.0)   | 63.7 (18.6)                |
| FVC (% predicted)                               | 97.4 (12.9)                | 96.3 (14.8)    | 99.3 (17.2)   | 89.1 (18.4)                |
| FEV <sub>1</sub> /FVC (% predicted)             | 97.2 (7.1)                 | 94.3 (7.3)     | 75.7 (8.9)    | 70.3 (11.6)                |
| Post-BD Spirometry                              |                            |                |               |                            |
| FEV <sub>1</sub> (% predicted)                  | 98.4 (13.5)                | 95.6 (14.0)    | 81.1 (16.7)   | 71.5 (18.9)                |
| FVC (% predicted)                               | 98.2 (12.5)                | 97.8 (13.7)    | 103.1 (16.6)  | 96.1 (17.3)                |
| FEV <sub>1</sub> /FVC (% predicted)             | 100.1 (6.6)                | 97.6 (6.4)     | 78.0 (8.6)    | 73.4 (11.8)                |
| BDR Indices                                     |                            |                |               |                            |
| ΔFEV <sub>1</sub> (ml)                          | 112.9 (136.8)              | 152.8 (160.5)  | 161.6 (171.1) | 260.5 (191.2)              |
| ΔFEV <sub>1</sub> % of initial FEV <sub>1</sub> | 3.9 (4.8)                  | 5.7 (6.8)      | 7.8 (8.9)     | 13.9 (11.8)                |
| ΔFEV <sub>1</sub> % of pred. FEV <sub>1</sub>   | 3.5 (4.1)                  | 4.7 (4.9)      | 5.1 (5.4)     | 7.8 (5.1)                  |

Data presented as mean (SD) unless otherwise indicated. ICS: inhaled corticosteroid

Complete data were obtained in 875 (99%) for smoking history, 201 (89%) for current ICS use, 147 (84%) for asthma severity

No 'reference sample' is provided in this table as all participants, by definition, had symptoms

**Sensitivity Analysis #1: 1 month asthma definition, ICS users excluded. (Tables E6 to E8)**

Table E6. [1 month definition, ICS users excluded] Areas under the ROC curve (AUC) of BDR measures as diagnostic classifiers for current doctor-diagnosed asthma and asthma-COPD overlap

|                                  |                                                         | AUC (95%CI)  |                     |
|----------------------------------|---------------------------------------------------------|--------------|---------------------|
|                                  |                                                         | Asthma       | Asthma-COPD overlap |
| General Sample<br>(Whole cohort) | $\Delta$ FEV <sub>1</sub> (ml)                          | 57% (50-64%) | 79% (70-88%)        |
|                                  | $\Delta$ FEV <sub>1</sub> % of initial FEV <sub>1</sub> | 59% (51-66%) | 86% (78-95%)        |
|                                  | $\Delta$ FEV <sub>1</sub> % of pred. FEV <sub>1</sub>   | 57% (50-65%) | 79% (70-88%)        |
| Symptomatic<br>Sample            |                                                         | Asthma       | Asthma-COPD overlap |
|                                  | $\Delta$ FEV <sub>1</sub> (ml)                          | 54% (47-62%) | 76% (66-85%)        |
|                                  | $\Delta$ FEV <sub>1</sub> % of initial FEV <sub>1</sub> | 55% (47-62%) | 83% (73-92%)        |
|                                  | $\Delta$ FEV <sub>1</sub> % of pred. FEV <sub>1</sub>   | 55% (47-63%) | 76% (66-86%)        |

Table E7. [1 month definition, ICS users excluded] General sample: Diagnostic parameters of BDR cut-off points for current doctor-diagnosed asthma and asthma-COPD overlap

| Cut-offs for Bronchodilator Reversibility (BDR):    | Sensitivity (95% CI) | Specificity (95% CI) | Positive predictive value (95% CI) | Negative predictive value (95% CI) | Positive likelihood ratio (95% CI) | Negative likelihood ratio (95% CI) | Diagnostic odds ratio (95% CI) |
|-----------------------------------------------------|----------------------|----------------------|------------------------------------|------------------------------------|------------------------------------|------------------------------------|--------------------------------|
| Asthma:                                             |                      |                      |                                    |                                    |                                    |                                    |                                |
| ΔFEV <sub>1</sub> (ml) ULN                          | 14% (7-24%)          | 92% (91-93%)         | 5% (2-9%)                          | 97% (97-98%)                       | 1.82 (1.00, 3.28)                  | 0.93 (0.85, 1.02)                  | 1.95 (0.98, 3.86)              |
| ΔFEV <sub>1</sub> % of initial FEV <sub>1</sub> ULN | 21% (14-32%)         | 93% (92-94%)         | 7% (4-11%)                         | 97% (97-98%)                       | 2.90 (1.83, 4.57)                  | 0.85 (0.75, 0.96)                  | 3.41 (1.92, 6.05)              |
| ΔFEV <sub>1</sub> % of pred. FEV <sub>1</sub> ULN   | 14% (8-24%)          | 94% (93-95%)         | 6% (3-11%)                         | 97% (97-98%)                       | 2.28 (1.26, 4.14)                  | 0.92 (0.84, 1.01)                  | 2.49 (1.25, 4.95)              |
| ΔFEV <sub>1</sub> 12% of initial +200ml             | 6% (2-13%)           | 97% (96-98%)         | 6% (2-14%)                         | 97% (96-98%)                       | 1.99 (0.75, 5.29)                  | 0.97 (0.92, 1.03)                  | 2.04 (0.73, 5.76)              |
| ΔFEV <sub>1</sub> 15% of initial +400ml             | 1% (0-8%)            | 99% (99-99%)         | 4% (0-21%)                         | 97% (96-98%)                       | 1.47 (0.20, 10.72)                 | 1.00 (0.97, 1.02)                  | 1.47 (0.20, 11.07)             |
| Asthma-COPD overlap:                                |                      |                      |                                    |                                    |                                    |                                    |                                |
| ΔFEV <sub>1</sub> (ml) ULN                          | 44% (27-63%)         | 92% (91-93%)         | 6% (3-10%)                         | 99% (99-100%)                      | 5.75 (3.62, 9.14)                  | 0.61 (0.43, 0.86)                  | 9.48 (4.24, 21.18)             |
| ΔFEV <sub>1</sub> % of initial FEV <sub>1</sub> ULN | 60% (41-77%)         | 93% (92-94%)         | 8% (4-12%)                         | 100% (99-100%)                     | 8.15 (5.74, 11.56)                 | 0.43 (0.27, 0.70)                  | 18.86 (8.35, 42.59)            |
| ΔFEV <sub>1</sub> % of pred. FEV <sub>1</sub> ULN   | 40% (23-59%)         | 94% (93-95%)         | 6% (3-11%)                         | 99% (99-100%)                      | 6.57 (3.96, 10.88)                 | 0.64 (0.46, 0.88)                  | 10.28 (4.54, 23.28)            |
| ΔFEV <sub>1</sub> 12% of initial +200ml             | 44% (27-63%)         | 97% (96-98%)         | 14% (7-24%)                        | 99% (99-100%)                      | 15.72 (9.53, 25.94)                | 0.58 (0.41, 0.82)                  | 27.29 (11.95, 62.32)           |
| ΔFEV <sub>1</sub> 15% of initial +400ml             | 12% (4-30%)          | 99% (99-99%)         | 12% (2-30%)                        | 99% (99-99%)                       | 12.68 (4.07, 39.52)                | 0.89 (0.77, 1.03)                  | 14.27 (3.99, 51.03)            |

ULN: Upper limit of normal. ΔFEV<sub>1</sub> ULN: 280 ml, ΔFEV<sub>1</sub> % of initial FEV<sub>1</sub> ULN: 9.2%, ΔFEV<sub>1</sub> % of pred. FEV<sub>1</sub> ULN: 8.8%

Table E8. [1 month definition, ICS users excluded] Symptomatic sample: Diagnostic parameters of BDR cut-off points for current doctor-diagnosed asthma and asthma-COPD overlap

| Cut-offs for Bronchodilator Reversibility (BDR):            | Sensitivity (95% CI) | Specificity (95% CI) | Positive predictive value (95% CI) | Negative predictive value (95% CI) | Positive likelihood ratio (95% CI) | Negative likelihood ratio (95% CI) | Diagnostic odds ratio (95% CI) |
|-------------------------------------------------------------|----------------------|----------------------|------------------------------------|------------------------------------|------------------------------------|------------------------------------|--------------------------------|
| Asthma:                                                     |                      |                      |                                    |                                    |                                    |                                    |                                |
| $\Delta$ FEV <sub>1</sub> (ml) ULN                          | 15% (8-26%)          | 89% (97-91%)         | 12% (6-21%)                        | 92% (89-94%)                       | 1.40 (0.76, 2.57)                  | 0.95 (0.86, 1.06)                  | 1.47 (0.72, 3.00)              |
| $\Delta$ FEV <sub>1</sub> % of initial FEV <sub>1</sub> ULN | 18% (86-91%)         | 89% (86-91%)         | 13% (7-22%)                        | 92% (90-94%)                       | 1.61 (0.93, 2.80)                  | 0.92 (0.82, 1.04)                  | 1.75 (0.90, 3.41)              |
| $\Delta$ FEV <sub>1</sub> % of pred. FEV <sub>1</sub> ULN   | 15% (8-26%)          | 92% (89-94%)         | 15% (7-26%)                        | 92% (90-94%)                       | 1.84 (0.99, 3.42)                  | 0.93 (0.83, 1.03)                  | 1.99 (0.96, 4.10)              |
| $\Delta$ FEV <sub>1</sub> 12% of initial +200ml             | 6% (2-15%)           | 95% (93-96%)         | 11% (3-25%)                        | 91% (89-93%)                       | 1.23 (0.45, 3.36)                  | 0.99 (0.93, 1.05)                  | 1.25 (0.43, 3.63)              |
| $\Delta$ FEV <sub>1</sub> 15% of initial +400ml             | 2% (0-8%)            | 98% (96-99%)         | 6% (0-30%)                         | 91% (90-93%)                       | 0.70 (0.09, 5.20)                  | 1.01 (0.98, 1.04)                  | 0.69 (0.09, 5.33)              |
| Asthma-COPD overlap:                                        |                      |                      |                                    |                                    |                                    |                                    |                                |
| $\Delta$ FEV <sub>1</sub> (ml) ULN                          | 42% (25-61%)         | 89% (87-91%)         | 12% (6-21%)                        | 98% (96-99%)                       | 3.84 (2.28, 6.45)                  | 0.65 (0.47, 0.92)                  | 5.87 (2.52, 13.67)             |
| $\Delta$ FEV <sub>1</sub> % of initial FEV <sub>1</sub> ULN | 50% (86-91%)         | 89% (86-91%)         | 15% (9-24%)                        | 98% (97-99%)                       | 4.43 (2.90, 7.78)                  | 0.56 (0.39, 0.82)                  | 7.86 (3.61, 17.10)             |
| $\Delta$ FEV <sub>1</sub> % of pred. FEV <sub>1</sub> ULN   | 42% (25-61%)         | 92% (89-94%)         | 15% (7-26%)                        | 98% (96-99%)                       | 5.05 (2.96, 8.62)                  | 0.64 (0.45, 0.89)                  | 7.95 (3.38, 18.69)             |
| $\Delta$ FEV <sub>1</sub> 12% of initial +200ml             | 46% (28-65%)         | 95% (93-96%)         | 24% (13-40%)                       | 98% (97-99%)                       | 9.32 (5.40, 16.06)                 | 0.57 (0.39, 0.82)                  | 16.35 (6.82, 39.18)            |
| $\Delta$ FEV <sub>1</sub> 15% of initial +400ml             | 13% (4-31%)          | 98% (96-99%)         | 17% (4-41%)                        | 97% (95-98%)                       | 5.76 (1.79, 18.57)                 | 0.89 (0.77, 1.04)                  | 6.44 (1.73, 23.94)             |

ULN: Upper limit of normal.  $\Delta$ FEV<sub>1</sub> ULN: 280 ml,  $\Delta$ FEV<sub>1</sub> % of initial FEV<sub>1</sub> ULN: 9.2%,  $\Delta$ FEV<sub>1</sub> % of pred. FEV<sub>1</sub> ULN: 8.8%

**Sensitivity Analysis #2: 12 month asthma definition, ICS users included (Tables E9 to E11)**

Methods E3: Disease definitions for sensitivity analysis #2. ‘Current doctor-diagnosed asthma’ was defined as asthma-related symptoms and/or healthcare or medication utilisation in the last 12 months in participants who self-reported doctor-diagnosed asthma and did not have post-bronchodilator (BD) airflow obstruction (AO). ‘Post-BD AO’ or ‘chronic obstructive pulmonary disease (COPD)’ was defined as a post-BD FEV<sub>1</sub>/FVC ratio below the lower limit of normal (LLN). ‘Asthma-COPD overlap’ (ACO) was defined by the combined criteria of current doctor-diagnosed asthma and post-BD AO. The three disease categories were therefore mutually exclusive.

Table E9. [12 month definition, ICS users included] Areas under the ROC curve (AUC) of BDR measures as diagnostic classifiers for current doctor-diagnosed asthma and asthma-COPD overlap

|                                  |                                                 | AUC (95%CI)  |                     |
|----------------------------------|-------------------------------------------------|--------------|---------------------|
|                                  |                                                 | Asthma       | Asthma-COPD overlap |
| General Sample<br>(Whole cohort) | ΔFEV <sub>1</sub> (ml)                          | 58% (55-62%) | 78% (72-84%)        |
|                                  | ΔFEV <sub>1</sub> % of initial FEV <sub>1</sub> | 61% (57-65%) | 85% (79-91%)        |
|                                  | ΔFEV <sub>1</sub> % of pred. FEV <sub>1</sub>   | 59% (55-63%) | 78% (71-84%)        |
| Symptomatic<br>Sample            |                                                 | Asthma       | Asthma-COPD overlap |
|                                  | ΔFEV <sub>1</sub> (ml)                          | 57% (52-61%) | 75% (68-82%)        |
|                                  | ΔFEV <sub>1</sub> % of initial FEV <sub>1</sub> | 58% (54-63%) | 82% (76-89%)        |
|                                  | ΔFEV <sub>1</sub> % of pred. FEV <sub>1</sub>   | 58% (53-62%) | 75% (68-82%)        |



Table E10. [12 month definition, ICS users included] General sample: Diagnostic parameters of BDR cut-off points for current doctor-diagnosed asthma and asthma-COPD overlap

| Cut-offs for Bronchodilator Reversibility (BDR):    | Sensitivity (95% CI) | Specificity (95% CI) | Positive predictive value (95% CI) | Negative predictive value (95% CI) | Positive likelihood ratio (95% CI) | Negative likelihood ratio (95% CI) | Diagnostic odds ratio (95% CI) |
|-----------------------------------------------------|----------------------|----------------------|------------------------------------|------------------------------------|------------------------------------|------------------------------------|--------------------------------|
| Asthma:                                             |                      |                      |                                    |                                    |                                    |                                    |                                |
| ΔFEV <sub>1</sub> (ml) ULN                          | 15% (11-20%)         | 92% (91-93%)         | 11% (8-17%)                        | 92% (90-93%)                       | 1.96 (1.40, 2.75)                  | 0.92 (0.87, 0.97)                  | 2.13 (1.44, 3.14)              |
| ΔFEV <sub>1</sub> % of initial FEV <sub>1</sub> ULN | 19% (14-24%)         | 93% (92-94%)         | 21% (16-27%)                       | 92% (91-93%)                       | 2.61 (1.93, 3.54)                  | 0.88 (0.82, 0.93)                  | 2.98 (2.07, 4.29)              |
| ΔFEV <sub>1</sub> % of pred. FEV <sub>1</sub> ULN   | 19% (13-25%)         | 92% (90-93%)         | 18% (13-25%)                       | 92% (90-93%)                       | 2.19 (1.56, 3.08)                  | 0.89 (0.83, 0.96)                  | 2.46 (1.63, 3.71)              |
| ΔFEV <sub>1</sub> 12% of initial +200ml             | 9% (6-13%)           | 97% (97-98%)         | 25% (16-35%)                       | 91% (90-93%)                       | 3.46 (2.15, 5.57)                  | 0.94 (0.90, 0.97)                  | 3.70 (2.21, 6.19)              |
| ΔFEV <sub>1</sub> 15% of initial +400ml             | 5% (3-8%)            | 99% (99-99%)         | 35% (19-55%)                       | 91% (90-92%)                       | 5.53 (2.68, 11.40)                 | 0.96 (0.93, 0.99)                  | 5.75 (2.72, 12.16)             |
| Asthma-COPD overlap:                                |                      |                      |                                    |                                    |                                    |                                    |                                |
| ΔFEV <sub>1</sub> (ml) ULN                          | 36% (23-49%)         | 92% (91-93%)         | 10% (6-15%)                        | 98% (98-99%)                       | 4.74 (3.22, 6.98)                  | 0.69 (0.57, 0.85)                  | 6.83 (3.82, 12.22)             |
| ΔFEV <sub>1</sub> % of initial FEV <sub>1</sub> ULN | 55% (41-67%)         | 93% (92-94%)         | 15% (10-20%)                       | 99% (98-99%)                       | 7.66 (5.76, 10.19)                 | 0.49 (0.36, 0.66)                  | 15.72 (8.95, 27.60)            |
| ΔFEV <sub>1</sub> % of pred. FEV <sub>1</sub> ULN   | 34% (23-47%)         | 94% (93-95%)         | 11% (7-17%)                        | 98% (98-99%)                       | 5.32 (3.54, 7.98)                  | 0.71 (0.58, 0.86)                  | 7.53 (4.17, 13.62)             |
| ΔFEV <sub>1</sub> 12% of initial +200ml             | 40% (28-53%)         | 97% (97-98%)         | 5% (16-36%)                        | 99% (98-99%)                       | 14.80 (9.80, 22.35)                | 0.62 (0.50, 0.77)                  | 23.85 (13.03, 43.67)           |
| ΔFEV <sub>1</sub> 15% of initial +400ml             | 11% (5-23%)          | 99% (99-99%)         | 24% (9-45%)                        | 98% (97-99%)                       | 14.02 (5.84, 33.68)                | 0.89 (0.81, 0.98)                  | 15.68 (5.99, 41.05)            |

ULN: Upper limit of normal. ΔFEV<sub>1</sub> ULN: 280 ml, ΔFEV<sub>1</sub> % of initial FEV<sub>1</sub> ULN: 9.2%, ΔFEV<sub>1</sub> % of pred. FEV<sub>1</sub> ULN: 8.8%

Table E11. [12 month definition, ICS users included] Symptomatic sample: Diagnostic parameters of BDR cut-off points for current doctor-diagnosed asthma and asthma-COPD overlap

| Cut-offs for Bronchodilator Reversibility (BDR):            | Sensitivity (95% CI) | Specificity (95% CI) | Positive predictive value (95% CI) | Negative predictive value (95% CI) | Positive likelihood ratio (95% CI) | Negative likelihood ratio (95% CI) | Diagnostic odds ratio (95% CI) |
|-------------------------------------------------------------|----------------------|----------------------|------------------------------------|------------------------------------|------------------------------------|------------------------------------|--------------------------------|
| Asthma:                                                     |                      |                      |                                    |                                    |                                    |                                    |                                |
| $\Delta$ FEV <sub>1</sub> (ml) ULN                          | 16% (12-21%)         | 89% (87-91%)         | 34% (25-44%)                       | 76% (72-79%)                       | 1.48 (1.01, 2.17)                  | 0.94 (0.88, 1.01)                  | 1.57 (1.01, 2.46)              |
| $\Delta$ FEV <sub>1</sub> % of initial FEV <sub>1</sub> ULN | 19% (15-25%)         | 89% (86-91%)         | 37% (28-47%)                       | 76% (73-79%)                       | 1.74 (1.22, 2.47)                  | 0.91 (0.85, 0.98)                  | 1.91 (1.25, 2.92)              |
| $\Delta$ FEV <sub>1</sub> % of pred. FEV <sub>1</sub> ULN   | 15% (10-20%)         | 92% (90-94%)         | 38% (28-50%)                       | 76% (72-79%)                       | 1.81 (1.19, 2.76)                  | 0.93 (0.88, 0.99)                  | 1.95 (1.21, 3.14)              |
| $\Delta$ FEV <sub>1</sub> 12% of initial +200ml             | 10% (7-15%)          | 95% (93-97%)         | 42% (28-57%)                       | 76% (72-79%)                       | 2.12 (1.23, 3.63)                  | 0.95 (0.90, 0.99)                  | 2.24 (1.25, 4.01)              |
| $\Delta$ FEV <sub>1</sub> 15% of initial +400ml             | 5% (3-9%)            | 98% (97-99%)         | 50% (28-72%)                       | 75% (72-78%)                       | 2.92 (1.29, 6.64)                  | 0.97 (0.93, 1.00)                  | 3.03 (1.29, 7.08)              |
| Asthma-COPD overlap:                                        |                      |                      |                                    |                                    |                                    |                                    |                                |
| $\Delta$ FEV <sub>1</sub> (ml) ULN                          | 36% (24-50%)         | 89% (87-91%)         | 21% (13-31%)                       | 95% (92-96%)                       | 3.34 (2.17, 5.16)                  | 0.72 (0.58, 0.89)                  | 4.66 (2.48, 8.75)              |
| $\Delta$ FEV <sub>1</sub> % of initial FEV <sub>1</sub> ULN | 54% (40-67%)         | 89% (86-91%)         | 28% (19-38%)                       | 96% (94-97%)                       | 4.87 (3.47, 6.83)                  | 0.52 (0.38, 0.70)                  | 9.41 (5.11, 17.31)             |
| $\Delta$ FEV <sub>1</sub> % of pred. FEV <sub>1</sub> ULN   | 36% (24-50%)         | 92% (90-94%)         | 26% (17-39%)                       | 95% (93-96%)                       | 4.48 (2.84, 7.06)                  | 0.70 (0.57, 0.86)                  | 6.44 (3.37, 12.27)             |
| $\Delta$ FEV <sub>1</sub> 12% of initial +200ml             | 42% (29-56%)         | 95% (93-97%)         | 42% (28-57%)                       | 95% (93-97%)                       | 9.01 (5.56, 14.59)                 | 0.61 (0.48, 0.77)                  | 14.81 (7.55, 29.05)            |
| $\Delta$ FEV <sub>1</sub> 15% of initial +400ml             | 12% (6-24%)          | 98% (97-99%)         | 25% (14-62%)                       | 93% (91-95%)                       | 6.79 (2.62, 17.58)                 | 0.90 (0.81, 0.99)                  | 7.57 (2.68, 21.45)             |

ULN: Upper limit of normal.  $\Delta$ FEV<sub>1</sub> ULN: 280 ml,  $\Delta$ FEV<sub>1</sub> % of initial FEV<sub>1</sub> ULN: 9.2%,  $\Delta$ FEV<sub>1</sub> % of pred. FEV<sub>1</sub> ULN: 8.8%

**Sensitivity Analysis #3: 12 month asthma definition, ICS users excluded (Tables E12 to E14)**

Methods E4: Disease definitions for sensitivity analysis #3. ‘Current doctor-diagnosed asthma’ was defined as asthma-related symptoms and/or healthcare or medication utilisation in the last 1 month in participants who self-reported doctor-diagnosed asthma and did not have post-bronchodilator (BD) airflow obstruction (AO). ‘Post-BD AO’ or ‘chronic obstructive pulmonary disease (COPD)’ was defined as a post-BD FEV<sub>1</sub>/FVC ratio below the lower limit of normal (LLN). ‘Asthma-COPD overlap’ (ACO) was defined by the combined criteria of current doctor-diagnosed asthma and post-BD AO. The three disease categories were therefore mutually exclusive.

Table E12. [12 month definition, ICS users excluded] Areas under the ROC curve (AUC) of BDR measures as diagnostic classifiers for current doctor-diagnosed asthma and asthma-COPD overlap

|                                  |                                                 | AUC (95%CI)  |                     |
|----------------------------------|-------------------------------------------------|--------------|---------------------|
|                                  |                                                 | Asthma       | Asthma-COPD overlap |
| General Sample<br>(Whole cohort) | ΔFEV <sub>1</sub> (ml)                          | 59% (54-64%) | 77% (68-85%)        |
|                                  | ΔFEV <sub>1</sub> % of initial FEV <sub>1</sub> | 61% (56-66%) | 83% (75-92%)        |
|                                  | ΔFEV <sub>1</sub> % of pred. FEV <sub>1</sub>   | 60% (55-65%) | 76% (68-84%)        |
| Symptomatic<br>Sample            |                                                 | Asthma       | Asthma-COPD overlap |
|                                  | ΔFEV <sub>1</sub> (ml)                          | 57% (52-62%) | 74% (65-82%)        |
|                                  | ΔFEV <sub>1</sub> % of initial FEV <sub>1</sub> | 58% (53-64%) | 80% (71-89%)        |
|                                  | ΔFEV <sub>1</sub> % of pred. FEV <sub>1</sub>   | 58% (53-64%) | 73% (64-82%)        |

Table E13. [12 month definition, ICS users excluded] General sample: Diagnostic parameters of BDR cut-off points for current doctor-diagnosed asthma and asthma-COPD overlap

| Cut-offs for Bronchodilator Reversibility (BDR):    | Sensitivity (95% CI) | Specificity (95% CI) | Positive predictive value (95% CI) | Negative predictive value (95% CI) | Positive likelihood ratio (95% CI) | Negative likelihood ratio (95% CI) | Diagnostic odds ratio (95% CI) |
|-----------------------------------------------------|----------------------|----------------------|------------------------------------|------------------------------------|------------------------------------|------------------------------------|--------------------------------|
| Asthma:                                             |                      |                      |                                    |                                    |                                    |                                    |                                |
| ΔFEV <sub>1</sub> (ml) ULN                          | 13% (9-19%)          | 93% (91-94%)         | 10% (6-15%)                        | 94% (93-95%)                       | 1.75 (1.13, 2.69)                  | 0.94 (0.88, 1.00)                  | 1.86 (1.13, 3.05)              |
| ΔFEV <sub>1</sub> % of initial FEV <sub>1</sub> ULN | 18% (12-24%)         | 93% (92-94%)         | 14% (10-20%)                       | 95% (94-95%)                       | 2.55 (1.75, 3.70)                  | 0.89 (0.82, 0.95)                  | 2.88 (1.85, 4.50)              |
| ΔFEV <sub>1</sub> % of pred. FEV <sub>1</sub> ULN   | 13% (9-19%)          | 94% (93-95%)         | 13% (8-19%)                        | 94% (93-95%)                       | 2.23 (1.44, 3.46)                  | 0.92 (0.87, 0.98)                  | 2.42 (1.47, 3.99)              |
| ΔFEV <sub>1</sub> 12% of initial +200ml             | 7% (4-12%)           | 97% (97-98%)         | 15% (8-26%)                        | 94% (93-95%)                       | 2.77 (1.49, 5.15)                  | 0.95 (0.91, 1.00)                  | 2.91 (1.50, 5.64)              |
| ΔFEV <sub>1</sub> 15% of initial +400ml             | 3% (1-7%)            | 99% (99-99%)         | 21% (7-42%)                        | 94% (93-95%)                       | 4.04 (1.53, 10.67)                 | 0.98 (0.95, 1.00)                  | 4.14 (1.53, 11.25)             |
| Asthma-COPD overlap:                                |                      |                      |                                    |                                    |                                    |                                    |                                |
| ΔFEV <sub>1</sub> (ml) ULN                          | 34% (21-51%)         | 93% (91-94%)         | 6% (3-11%)                         | 99% (98-99%)                       | 4.58 (2.84, 7.41)                  | 0.71 (0.56, 0.90)                  | 6.45 (3.16, 13.19)             |
| ΔFEV <sub>1</sub> % of initial FEV <sub>1</sub> ULN | 51% (36-67%)         | 93% (92-94%)         | 10% (6-15%)                        | 99% (99-100%)                      | 7.43 (5.21, 10.59)                 | 0.52 (0.37, 0.73)                  | 14.23 (7.20, 28.14)            |
| ΔFEV <sub>1</sub> % of pred. FEV <sub>1</sub> ULN   | 31% (19-48%)         | 94% (93-95%)         | 7% (4-13%)                         | 99% (98-99%)                       | 5.37 (3.20, 8.90)                  | 0.73 (0.58, 0.91)                  | 7.37 (3.54, 15.35)             |
| ΔFEV <sub>1</sub> 12% of initial +200ml             | 34% (21-51%)         | 97% (97-98%)         | 17% (9-27%)                        | 99% (99-99%)                       | 13.37 (7.93, 22.53)                | 0.67 (0.53, 0.86)                  | 19.82 (9.42, 41.68)            |
| ΔFEV <sub>1</sub> 15% of initial +400ml             | 11% (5-26%)          | 99% (99-100%)        | 18% (5-40%)                        | 99% (98-99%)                       | 14.85 (5.30, 41.63)                | 0.79 (1.01)                        | 16.64 (5.32, 52.02)            |

ULN: Upper limit of normal. ΔFEV<sub>1</sub> ULN: 280 ml, ΔFEV<sub>1</sub> % of initial FEV<sub>1</sub> ULN: 9.2%, ΔFEV<sub>1</sub> % of pred. FEV<sub>1</sub> ULN: 8.8%

Table E14. [12 month definition, ICS users excluded] Symptomatic sample: Diagnostic parameters of BDR cut-off points for current doctor-diagnosed asthma and asthma-COPD overlap

| Cut-offs for Bronchodilator Reversibility (BDR):            | Sensitivity (95% CI) | Specificity (95% CI) | Positive predictive value (95% CI) | Negative predictive value (95% CI) | Positive likelihood ratio (95% CI) | Negative likelihood ratio (95% CI) | Diagnostic odds ratio (95% CI) |
|-------------------------------------------------------------|----------------------|----------------------|------------------------------------|------------------------------------|------------------------------------|------------------------------------|--------------------------------|
| Asthma:                                                     |                      |                      |                                    |                                    |                                    |                                    |                                |
| $\Delta$ FEV <sub>1</sub> (ml) ULN                          | 14% (10-21%)         | 90% (87-92%)         | 24% (15-34%)                       | 82% (79-85%)                       | 1.38 (0.87, 2.20)                  | 0.96 (0.89, 1.03)                  | 1.45 (0.84, 2.48)              |
| $\Delta$ FEV <sub>1</sub> % of initial FEV <sub>1</sub> ULN | 18% (13-25%)         | 90% (87-92%)         | 28% (19-39%)                       | 83% (80-86%)                       | 1.75 (1.15, 2.68)                  | 0.91 (0.84, 0.99)                  | 1.92 (1.16, 3.19)              |
| $\Delta$ FEV <sub>1</sub> % of pred. FEV <sub>1</sub> ULN   | 14% (10-21%)         | 92% (90-94%)         | 30% (20-43%)                       | 83% (80-85%)                       | 1.92 (1.18, 3.14)                  | 0.93 (0.86, 0.99)                  | 2.08 (1.19, 3.64)              |
| $\Delta$ FEV <sub>1</sub> 12% of initial +200ml             | 8% (5-14%)           | 96% (94-97%)         | 30% (16-47%)                       | 82% (79-85%)                       | 1.87 (0.95, 3.69)                  | 0.96 (0.91, 1.01)                  | 1.95 (0.94, 4.04)              |
| $\Delta$ FEV <sub>1</sub> 15% of initial +400ml             | 4% (2-8%)            | 98% (97-99%)         | 33% (12-62%)                       | 82% (79-85%)                       | 2.21 (0.77, 6.36)                  | 0.98 (0.95, 1.01)                  | 2.26 (0.76, 6.71)              |
| Asthma-COPD overlap:                                        |                      |                      |                                    |                                    |                                    |                                    |                                |
| $\Delta$ FEV <sub>1</sub> (ml) ULN                          | 33% (20-50%)         | 90% (87-92%)         | 15% (8-25%)                        | 96% (94-98%)                       | 3.18 (1.86, 5.43)                  | 0.75 (0.58, 0.95)                  | 4.27 (1.98, 9.20)              |
| $\Delta$ FEV <sub>1</sub> % of initial FEV <sub>1</sub> ULN | 48% (33-65%)         | 90% (87-92%)         | 20% (12-31%)                       | 97% (95-98%)                       | 4.70 (3.08, 7.16)                  | 0.57 (0.41, 0.80)                  | 8.17 (3.94, 16.97)             |
| $\Delta$ FEV <sub>1</sub> % of pred. FEV <sub>1</sub> ULN   | 33% (20-50%)         | 92% (90-94%)         | 19% (10-32%)                       | 96% (94-98%)                       | 4.42 (2.53, 7.71)                  | 0.72 (0.57, 0.92)                  | 6.13 (2.80, 13.42)             |
| $\Delta$ FEV <sub>1</sub> 12% of initial +200ml             | 36% (22-53%)         | 96% (94-97%)         | 32% (18-49%)                       | 97% (95-98%)                       | 8.53 (4.74, 15.35)                 | 0.67 (0.51, 0.86)                  | 12.84 (5.71, 28.88)            |
| $\Delta$ FEV <sub>1</sub> 15% of initial +400ml             | 12% (5-27%)          | 98% (97-99%)         | 29% (8-58%)                        | 95% (93-97%)                       | 7.39 (2.45, 22.33)                 | 0.89 (0.79, 1.02)                  | 8.28 (2.45, 27.97)             |

ULN: Upper limit of normal.  $\Delta$ FEV<sub>1</sub> ULN: 280 ml,  $\Delta$ FEV<sub>1</sub> % of initial FEV<sub>1</sub> ULN: 9.2%,  $\Delta$ FEV<sub>1</sub> % of pred. FEV<sub>1</sub> ULN: 8.8%

References:

1. Fluss R, Faraggi D, Reiser B. Estimation of the Youden Index and its associated cutoff point. Biometrical journal Biometrische Zeitschrift. 2005;47(4):458-72.
2. Youden WJ. Index for rating diagnostic tests. Cancer. 1950;3(1):32-5.
3. Liu X. Classification accuracy and cut point selection. Statistics in medicine. 2012;31(23):2676-86.
